# Supplementary material
Source: PubMed Central journal article supplement (PMC2900665)
Supplement: 1007158107_pnas.201007158SI.pdf [file 1007158107_pnas.201007158SI.pdf]

# Supporting Information

Frost et al. 10.1073/pnas.1007158107

## SI Materials and Methods

**In Situ Hybridization.** Probes were amplified from testis cDNA by PCR and cloned into the pCRII-TOPO vector (Invitrogen) using the following primers: 3' UTR of *Mov10l1*, forward primer—5'-CCAGGCTCTCCAAAAGTGAG-3'; reverse primer—5'-AAG-GTCAGTCCAAGGAAGCA-3'; C-terminal region of *Mov10l1*, forward primer—5'-GGCCTATGGGTTGAATGTGT-3'; and reverse primer—5'-GATGGGCTTCTCCCTTCAC-3'.

**Histological and Immunohistological Examination.** For histology, tissues were fixed in Bouin's solution or with 4% paraformaldehyde (PFA) in PBS, embedded in paraffin wax, cut into 5- $\mu$ m thick sections, and stained with hematoxylin and eosin (H&E). For immunofluorescence staining, primary antibodies were used in 1:400 dilutions: anti-LINE ORF1p antibody (kindly provided by Sandra L. Martin, University of Colorado School of Medicine), anti-Mili antibody (Abcam), and anti-Miwi antibody (Abcam). Anti-SCP1 and anti-SCP3 antibodies (Novus Biologicals) were used in 1:200 dilutions. For detection of apoptotic cells, testis sections were deparaffinized and then treated with TUNEL reagent (in situ cell death detection kit, Roche). Nuclei were counterstained with DAPI.

**RNA Analysis.** Total RNA was extracted from tissues using TRIzol reagent according to the manufacturer's instructions (Invitrogen). For real-time PCR, 1  $\mu$ g RNA was reverse-transcribed using SuperScript II reverse transcriptase (Invitrogen) and random hexamer primers and then used as a template for SybrGreen real-time PCR. Primers for full-length *Mov10l1* were 5'-GACTTTC-CAGCCGCTTCTT-3' and 5'-TGCATGGATCTCCTCTAGCC-3'; for *Champ*, 5'-GTACCACGGACCAGCCAGA-3' and 5'-GAGAAGCTCCTTATCTCGTGCTT-3'; for *Csm*, 5'-TGCGGTGCATATAACCCATT-3' and 5'-ATGGTAGAACAGGCGTG-AGG-3'; and for the exon 20 splice variant (E20-SV), 5'-AAATATGATGGAATTAACCATGAGAC-3' and 5'-AGAGCCGAGTGGGACCTG-3'. For microarray analysis, RNA from testes of two to three mice was pooled for each time point. Microarray analysis was then performed by the University of Texas Southwestern Microarray Core Facility using Illumina's Mouse-6 V2 BeadChip. Expression data of *Mov10l1*, *Mov10*, *Mili*, and *Hspa2*

(Fig. 1A and B; Fig. S5C) was from the Gene Expression Omnibus (GEO), National Center for Biotechnology Information (NCBI) Reference Series GES640, GES829, and GES830. For Northern blotting, 8  $\mu$ g total testis RNA was denatured for 5 min at 70  $^{\circ}$ C in a buffer containing 50% formamide and 10 mM EDTA. After electrophoresis on a 17% polyacrylamide gel, RNA was transferred onto a Hybond N membrane (Amersham) in 0.5 $\times$  Tris/Borate/EDTA (TBE) buffer at 80 V for 1 h. Hybridization was then at 39  $^{\circ}$ C with  $^{32}$ P-labeled Star-Fire oligonucleotide probes (Integrated DNA Technologies) directed against let-7a and a subset of piRNAs. For detection of total piRNAs, total RNA extracted from testes was dephosphorylated at the 5' ends with antarctic phosphatase (New England Biolabs) and then end-labeled using T4 polynucleotide kinase (New England Biolabs) and [ $\gamma$ - $^{32}$ P]ATP. One microgram of radio-labeled RNA was separated on a 17% denaturing PAGE, and signals were detected with x-ray film.

**Generation of Conditional *Mov10l1* Knockout Mice.** For generation of the *Mov10l1* targeting vector, 5' arm, 3' arm, and the exon 20 containing the knockout arm were PCR amplified from 129SvEv genomic DNA and cloned into the pGKNEO-F2L2DTA plasmid (Addgene plasmid 13445). The targeting vector was then linearized and electroporated into 129SvEv-derived ES cells. A total of 100 neomycin-resistant ES cell clones were isolated and analyzed for homologous recombination by Southern blotting. Three clones with a properly targeted *Mov10l1* allele were injected into 3.5-d-old C57BL/6 blastocysts, and high-percentage chimeric male mice were then crossed to C57BL/6 females. We achieved successful germline transmission with all three clones and kept mice from two clones as independent lines until identical phenotypes could be confirmed for both lines. Heterozygous *Mov10l1*<sup>neo/+</sup> mice were intercrossed with hACTB:FLPe transgenic mice to remove the neomycin resistance cassette, and global deletion of exon 20 was then achieved by breeding *Mov10l1*<sup>+fl</sup> mice to CAG-Cre transgenic mice. Mouse genotypes were determined by PCR using tail DNA and primers specific to the *Mov10l1* locus. To test for fertility, six male *Mov10l1*<sup>-/-</sup> mice were bred with wild-type and *Mov10l1*<sup>+/-</sup> females, respectively, over a 5-mo mating period.

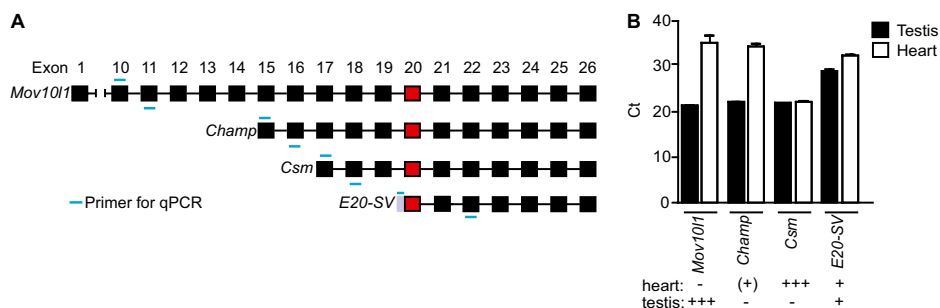

**Fig. S1.** Selective expression of full-length *Mov10l1* in spermatogenic cells. (A) Schematic depiction of the exon structure of mouse full-length *Mov10l1* and two known splice variants of the *Mov10l1* gene, *Champ* (cardiac helicase activated by MEF2 protein) and *Csm* (cardiac-specific isoform of *Mov10l1* gene). EST data suggested the existence of another splice variant starting at exon 20 (E20-SV). Exon 20 contains the putative helicase domain (red). (B) mRNA expression of the known and predicted isoforms of the *Mov10l1* gene was determined in heart and testis lysates by real-time PCR. The primer pair for full-length *Mov10l1* was isoform-specific, as were the primers for the potential splice variant starting at exon 20 (forward primer was located in the predicted 5' UTR). Primers for *Champ* also detected full-length *Mov10l1* and primers for *Csm* also detected *Champ* and full-length *Mov10l1*. Primer locations are indicated in A with blue lines. Because testis expression with *Champ* or *Csm* primers did not change compared with using isoform-specific *Mov10l1* primers, all of the expression presumably came from the *Mov10l1* full-length transcript. In contrast, heart expression increased with *Csm* primers as compared with *Mov10l1* or *Champ* primers, suggesting that *Csm* is the predominantly expressed transcript in the heart. Results are presented as threshold cycles (Ct). +++, strong expression; +, weak expression; -, absent.





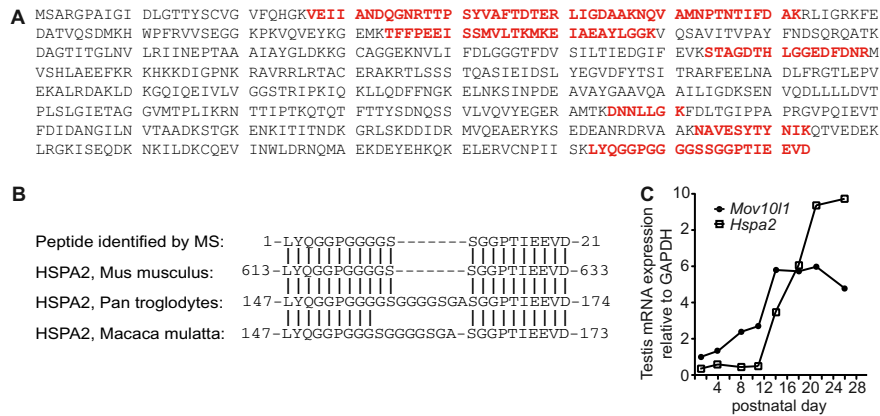

**Fig. S5.** Identification of HSPA2 as interaction partner of MOV10L1 by mass spectrometry (MS). (A) Sequence of murine HSPA2 (gene ID, 15512); the peptides that were identified by MS are in red. (B) To verify that HSPA2 was derived from mouse testis and not from COS cells, which originate from the African green monkey (*Chlorocebus sabaeus*), we performed a BLAST search with the longest identified (by MS) HSPA2-specific peptide (LYQGGPGGGSSGGPTIEEVD); this peptide showed solely 100% identity with rat and mouse HSPA2 (*Mus musculus*, gene ID 15512) and merely partial identity with the HSPA2 from chimpanzee (*Pan troglodytes*, gene ID 450139) or rhesus monkey (*Macaca mulatta*, gene ID 574271). The genome of the African green monkey is not yet sequenced, but chimpanzee, rhesus monkey, and African green monkey have a common ancestor, which compared with mouse obviously had an insertion in the analyzed HSPA2 peptide. (C) Relative expression of *Hspa2* and *Mov10l1* mRNA in testes of C57BL/6 mice during postnatal development (NCBI GEO Series, GES640).

#### Dataset S1. Genes up-regulated in *Mov10l1*<sup>-/-</sup> mice

##### [Dataset S1](#)

Gene expression in *Mov10l1*<sup>-/-</sup> mice versus *Mov10l1*<sup>+/-</sup> mice was determined at P10, P12, and P14 by microarray analysis (Illumina's Mouse-6 V2 BeadChip) of pooled testis RNA from two to three mice for each time point. Depicted are the genes (target ID, transcript #, accession #, probe ID, gene name) that were >2 times up-regulated in *Mov10l1*<sup>-/-</sup> mice versus *Mov10l1*<sup>+/-</sup> mice at P14.

#### Dataset S2. Genes down-regulated in *Mov10l1*<sup>-/-</sup> mice

##### [Dataset S2](#)

Gene expression in *Mov10l1*<sup>-/-</sup> mice versus *Mov10l1*<sup>+/-</sup> mice was determined at P10, P12, and P14 by microarray analysis (Illumina's Mouse-6 V2 BeadChip) of pooled testis RNA from two to three mice for each time point. Depicted are the genes (target ID, transcript #, accession #, probe ID, gene name) that were >50% down-regulated in *Mov10l1*<sup>-/-</sup> mice versus *Mov10l1*<sup>+/-</sup> mice at P14.
